# Supplementary material
Source: PubMed Central journal article supplement (PMC1890512)
Supplement: pnas_0603523104_1.pdf [file pnas_0603523104_1.pdf]

# Overview of Chr12 (Mb)

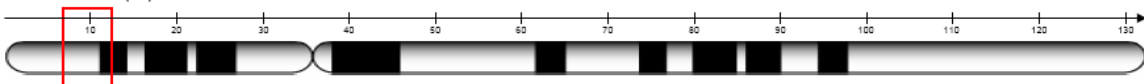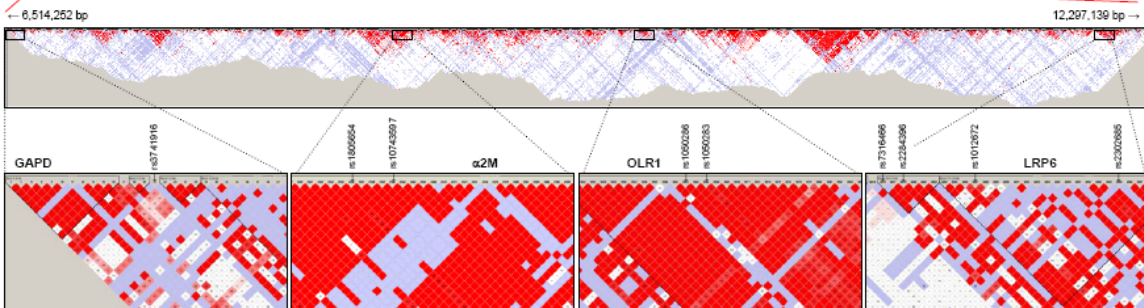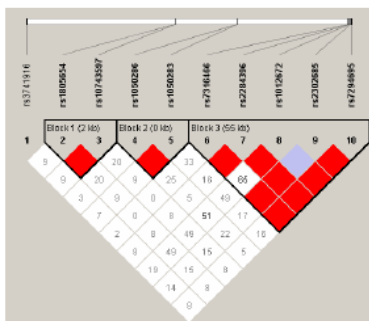

| marker | gene  | SNP        | allele | position | Obs | aa change  | reference                                                       |
|--------|-------|------------|--------|----------|-----|------------|-----------------------------------------------------------------|
| 1      | GAPDH | rs3741916  | C/G    | 6514252  |     |            | Li et al., PNAS 101, 15688-15693 (2004)                         |
| 2      | A2M   | rs1805654  | A/G    | 9120896  | 28i |            | Saunders et al., Hum Mol Genetics 12, 2765-2776 (2003)          |
| 3      | A2M   | rs10743597 | A/G    | 9123535  | 24e | Val1000Ile | Saunders et al., Hum Mol Genetics 12, 2765-2776 (2003)          |
| 4      | OLR1  | rs1050286  | A/G    | 10202630 |     |            | Papassotiropoulos, A. et al. J Clin Psychiatry 66, 940-7 (2005) |
| 5      | OLR1  | rs1050283  | C/T    | 10203556 |     |            | Luedeking-Zimmer et al., Hum Genet 111, 443-451 (2002)          |
| 6      | LRP6  | rs7316466  | C/T    | 12159793 |     |            | This study                                                      |
| 7      | LRP6  | rs2284396  | C/T    | 12166202 |     |            | This study                                                      |
| 8      | LRP6  | rs1012672  | C/T    | 12176182 | 18e |            | This study                                                      |
| 9      | LRP6  | rs2302685  | C/T    | 12193165 | 14e | Val1082Ile | This study                                                      |
| 10     | LRP6  | rs7294695  | C/G    | 12214885 |     |            | This study                                                      |
