# Supplementary material
Source: PubMed Central journal article supplement (PMC1890512)

Number of transcripts  
(Rel. 100.000 copies of  $\beta$ -actin)

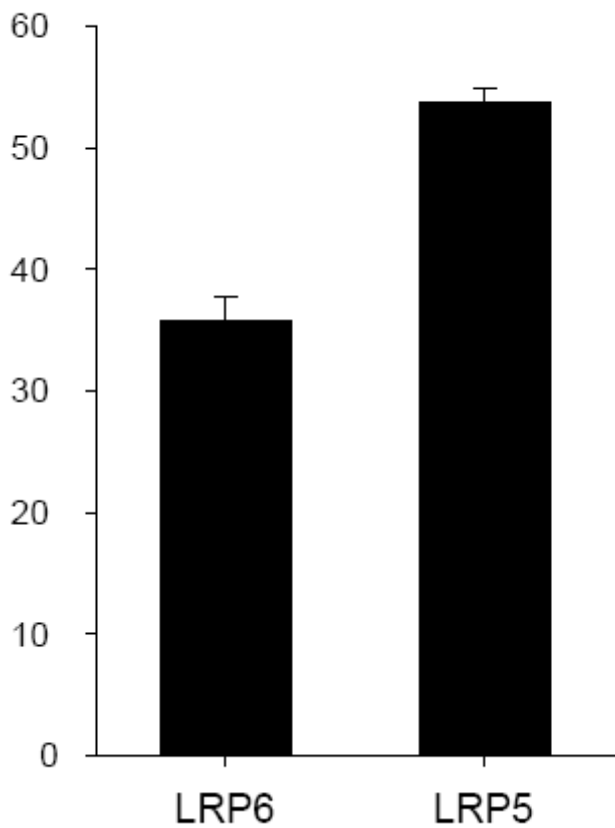

Supplement: pnas_0603523104_2.pdf [file pnas_0603523104_2.pdf]

Ile1062->Val

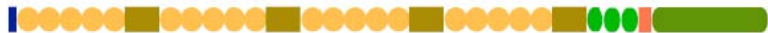

signal peptide

YWTD

EGF-like

LDLR

TM

intracellular

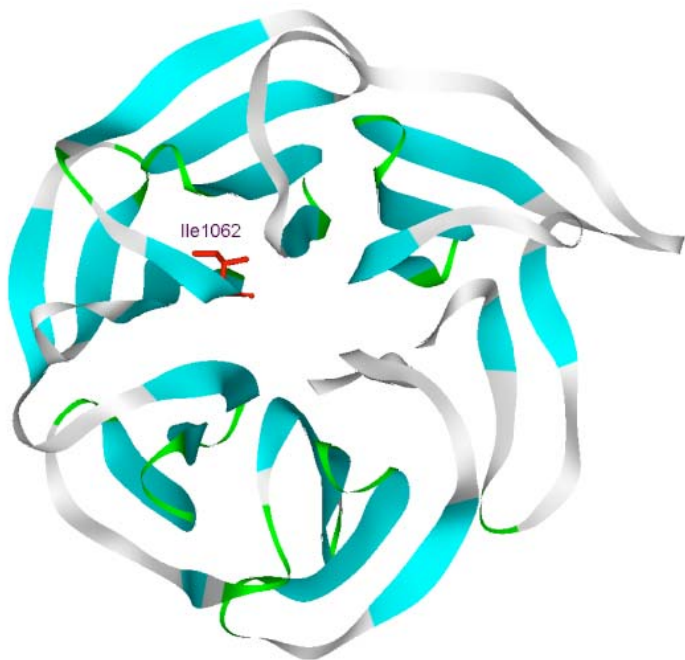

Supplement: pnas_0603523104_3.pdf [file pnas_0603523104_3.pdf]

**A**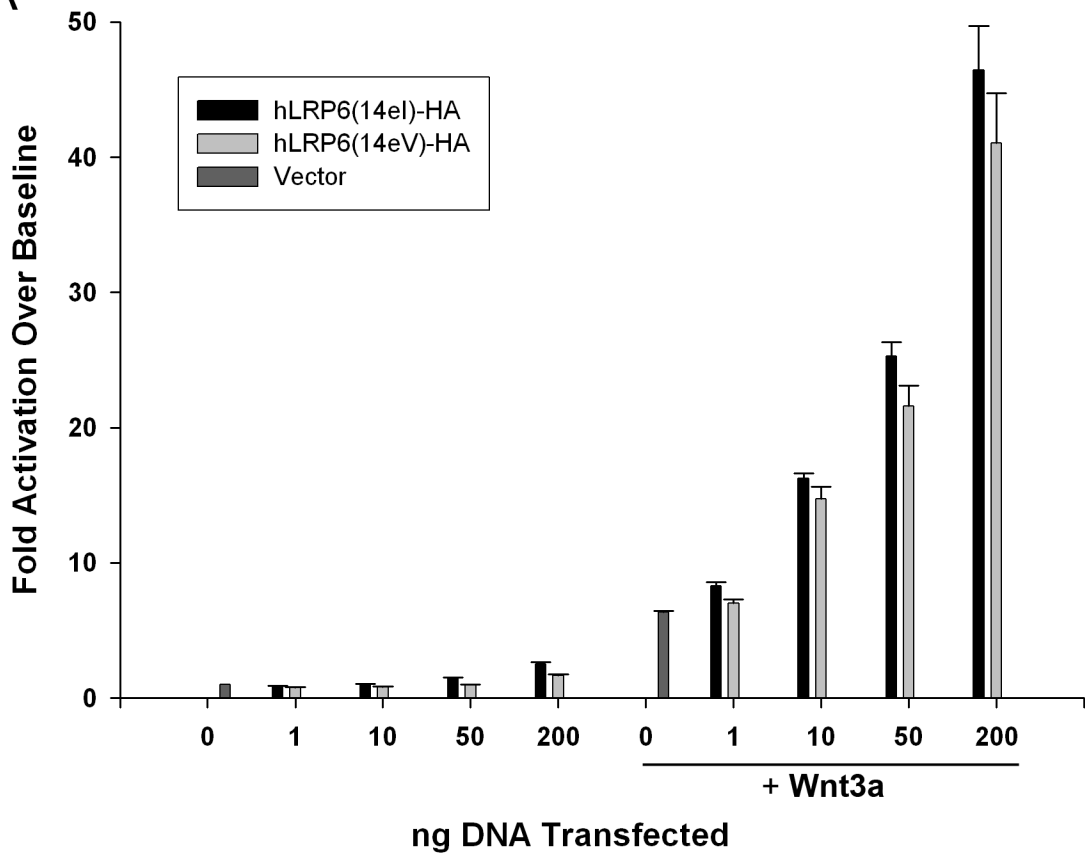**B**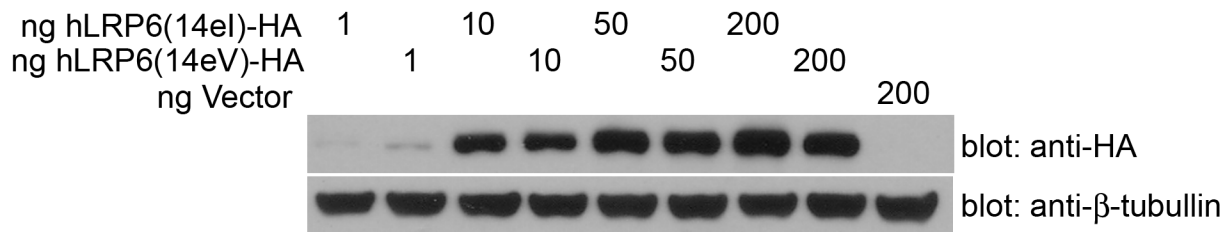**C**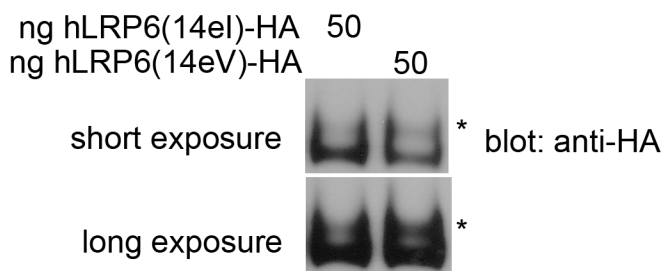

Supplement: pnas_0603523104_4.pdf [file pnas_0603523104_4.pdf]
